# Positive predictive value of ERBB2 copy number gain by tissue or circulating tumor DNA next-generation sequencing across advanced cancers

Ami N. Shah<sup>1</sup>, Ashwin Sunderraj<sup>1</sup>, Brian Finkelman<sup>2</sup>, Sharlene H. See<sup>1</sup>, Andrew A. Davis<sup>3</sup>, Lorenzo Gerratana<sup>4</sup>, Firas Wehbe<sup>1</sup>, Neelima Katam<sup>1</sup>, Deva Mahalingam<sup>1</sup>, William J. Gradishar<sup>1</sup>, Amir Behdad<sup>1</sup>, Luis Blanco<sup>1</sup> and Massimo Cristofanilli<sup>1</sup>

<sup>1</sup>Robert H. Lurie Comprehensive Cancer Center of Northwestern University, Chicago, IL, USA

<sup>2</sup>Department of Pathology, The Johns Hopkins Medical Institutions, Baltimore, MD, USA

<sup>3</sup>Siteman Cancer Center of Washington University, St. Louis, MO, USA

<sup>4</sup>Department of Medical Oncology, Centro di Riferimento Oncologico (CRO), IRCCS, Aviano, Italy

**Correspondence to:** Ami N. Shah, *email:* amishah@northwestern.edu

**Keywords:** ERBB2; HER2; next-generation sequencing; copy number gain; circulating tumor DNA

**Received:** November 30, 2021

**Accepted:** January 10, 2022

**Published:** February 02, 2022

**Copyright:** © 2022 Shah et al. This is an open access article distributed under the terms of the [Creative Commons Attribution License](#) (CC BY 3.0), which permits unrestricted use, distribution, and reproduction in any medium, provided the original author and source are credited.

## ABSTRACT

**Background:** The correlation of ERBB2 copy number gain (CNG) from tissue or circulating tumor DNA (ctDNA) by next-generation sequencing (NGS) with standard HER2 tissue evaluation is not well understood.

**Materials and Methods:** We retrospectively identified patients with ERBB2 CNG on commercial NGS. We described their clinical-pathologic features and calculated the positive predictive value (PPV) of ERBB2 CNG by NGS for HER2-positivity by IHC and FISH testing.

**Results:** 176 patients had NGS revealing an ERBB2 CNG (112 by tumor tissue and 91 by ctDNA). The cancer subtypes with the most cases with ERBB2 CNG by NGS were breast ( $n = 67$ ), non-small cell lung ( $n = 25$ ), colorectal ( $n = 18$ ), gastroesophageal ( $n = 17$ ), pancreatic ( $n = 11$ ), and uterine ( $n = 11$ ). The PPV of ERBB2 CNG in determining HER2 positivity by standard IHC/FISH definitions was 88% for tissue NGS ( $n = 57$ ) and 80% for ctDNA ( $n = 47$ ). The PPV among breast cancer patients for tissue NGS was 97% ( $n = 35$ ) and ctDNA was 93% ( $n = 39$ ). However, for non-breast cancer cases, the PPV of ERBB2 amplification by tissue NGS dropped to 76% ( $n = 22$ ) and by ctDNA to 44% ( $n = 7$ ).

**Conclusions:** ERBB2 CNG by NGS is detected in numerous malignancies for which HER2 testing is not standard. Detection of ERBB2 CNG by tissue NGS and ctDNA has a high PPV for true HER2-positivity by standard IHC and/or FISH testing in breast cancer.

## INTRODUCTION

Trastuzumab's approval in 1998 after it was shown to improve overall survival in HER2-positive metastatic breast cancer is one of the earliest successes in precision oncology and targeted therapies [1]. Since that time, advances in next-generation sequencing (NGS) technology have translated into the ability to efficiently study a broad array of molecular changes in patients with advanced

cancer [2]. However, the clinical implications of gene alterations revealed by NGS in the context of a specific disease subtype or patient is often not known.

Overexpression of HER2, primarily as a result of amplification of *ERBB2*, identifies an aggressive breast cancer phenotype with a high risk for metastatic disease to visceral organs and the central nervous system. HER2-targeted therapies have dramatically changed the outcomes in patients with HER2-driven breast cancers, with the

median overall survival for metastatic HER2-positive breast cancer reaching over 4 years and over one-third of patients surviving at 8 years [3]. HER2 overexpression and/or amplification is also seen in other cancers and has been shown to be predictive of trastuzumab efficacy for these diseases [4–6].

To date, all FDA-approved uses of HER2 targeted agents have been based on studies using HER2 immunohistochemistry (IHC) or fluorescence *in situ* hybridization (FISH) testing as a predictive assay to identify those who are likely to benefit from therapy [7]. Given the increasing access to and utilization of tumor tissue and ctDNA NGS in advanced malignancies, we aimed to better understand how *ERBB2* copy number gains (CNG) by commercial NGS platforms of tissue or blood predict for HER2-positivity by the ‘gold-standard’ of IHC and FISH assays. Additionally we aimed to describe malignancies with NGS HER2 CNG in tumor types for which HER2 testing by IHC or FISH is not routinely done.

## RESULTS

As of September 2019, the OncoSET database included 3337 patients with tissue NGS reports (FoundationOne or TempusX) and 1779 patients had ctDNA NGS testing (Guardant360). Of these patients, 177 patients were identified with CNG of *ERBB2* by tissue or blood-based NGS testing. Tissue NGS identified *ERBB2* CNG in 113 patients (3.3% of patients with tissue NGS reports, 82 on FoundationOne, 35 by TempusX, and

1 by both), and ctDNA NGS identified *ERBB2* CNG in 91 patients (5.2% of patients with NGS ctDNA testing). Twenty-seven patients had *ERBB2* amplification by both tissue NGS and ctDNA.

The median age at sample collection was 56 years (interquartile range 45–65 years), 69.5% were female, race was 73% White, 7% Asian, 12% Black, and 11% unknown, and 9% were Hispanic (Table 1). *ERBB2* CNG was seen in 18 subtypes of cancer (Figure 1), the most common malignancies of which were: breast ( $n = 68$ ), non-small cell lung (NSCLC,  $n = 25$ ), colorectal ( $n = 18$ ), gastroesophageal ( $n = 17$ , 15 adenocarcinoma, 2 squamous), pancreatic ( $n = 11$ ), uterine ( $n = 11$ ), bladder/upper tract ( $n = 7$ ), ovarian/fallopian tube ( $n = 4$ ), biliary ( $n = 3$ ), and small cell lung cancers (SCLC,  $n = 3$ ) (Figure 1). *ERBB2* CNG was also seen in patients with anal cancer, carcinoma unknown primary, cervical cancer, melanoma, neuroendocrine cancer, renal cell carcinoma, and salivary gland cancer ( $n = 1$  for each). The site of biopsy used for IHC and NGS testing, if tissue NGS testing was performed, was liver in 37%, lymph node in 18%, lung in 12%, bone in 7%, central nervous system in 5%, skin in 5%, with the remainder from other sites, most frequently breast.

Overall 60% of patients with *ERBB2* CNG by NGS testing had corresponding complete IHC/FISH, including 99% of patients with breast cancer, 40% of patients with GEA, and 35% of patients with other cancers (Table 2).

The PPV of *ERBB2* CNG for HER2-positivity was 82% (95% confidence interval 73%–89%) overall, 88%

### Distribution of malignancies with *ERBB2* NGS amplification

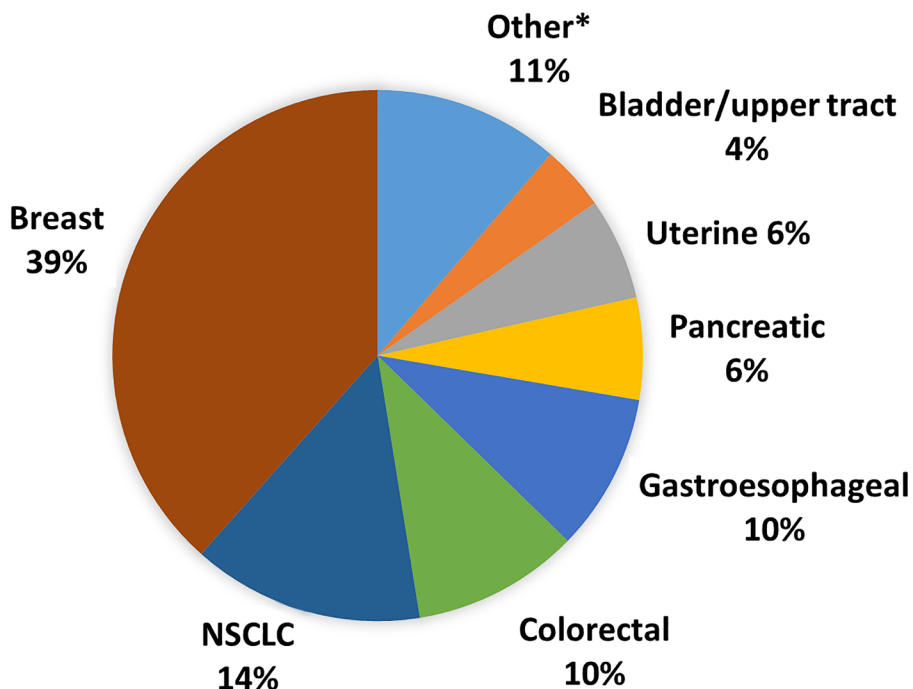

**Figure 1: Cancer subtypes with *ERBB2* CNG.** \*Other includes ovarian/fallopian tube (4), biliary (3), SCLC (3), neuroendocrine (2), salivary (2), anal (1), cervical (1), melanoma (1), RCC (1), small bowel (1), unknown primary (1)

**Table 1: Clinical and pathologic characteristics of patients with *ERBB2* CNG with HER2 tissue IHC and/or FISH testing and PPV of *ERBB2* CNG for HER2-positivity**

|                                   | Overall     | Breast     | GEA        | Other      |
|-----------------------------------|-------------|------------|------------|------------|
| Age (Median, Interquartile Range) | 54.9        | 51.5       | 64.8       | 65.0       |
| Gender                            |             |            |            |            |
| Female                            | 94 (83.2%)  | 66 (98.5%) | 6 (85.7%)  | 26 (66.7%) |
| Male                              | 19 (16.8%)  | 1 (1.5%)   | 1 (14.2%)  | 13 (33.3%) |
| Race                              |             |            |            |            |
| Asian                             | 2 (1.8%)    | 1 (1.5%)   | 1 (14.3%)  | 0          |
| Black or African American         | 14 (12.4%)  | 8 (11.9%)  | 0          | 6 (15.4%)  |
| White                             | 79 (69.9%)  | 46 (68.7%) | 5 (71.4%)  | 28 (71.8%) |
| Unknown                           | 17 (15.0%)  | 11 (16.4%) | 1 (14.3%)  | 5 (12.8%)  |
| Ethnicity                         |             |            |            |            |
| Not Hispanic or Latino            | 97 (85.8%)  | 58 (86.6%) | 7 (100%)   | 32 (82.1%) |
| Unknown                           | 9 (8.0%)    | 4 (6.0%)   | 0          | 5 (12.8%)  |
| Hispanic or Latino                | 7 (6.2%)    | 5 (7.5%)   | 0          | 2 (5.1%)   |
| Biopsy Site                       |             |            |            |            |
| Other                             | 33 (29.2%)  | 15 (22.4%) | 6 (85.71%) | 12 (30.8%) |
| Liver                             | 21 (18.58%) | 9 (13.4%)  | 1 (14.29%) | 11 (28.2%) |
| Lymph Node                        | 16 (14.16%) | 10 (14.9%) | 0 (0.00%)  | 6 (15.4%)  |
| Lung                              | 14 (12.4%)  | 7 (10.5%)  | 0          | 7 (18.0%)  |
| Bone                              | 11 (9.7%)   | 10 (14.9%) | 0          | 1 (2.6%)   |
| Skin                              | 8 (7.1%)    | 8 (11.9%)  | 0          | 0          |
| CNS                               | 8 (7.1%)    | 7 (10.5%)  | 0          | 1 (2.6%)   |
| Breast                            | 1 (0.9%)    | 1 (1.5%)   | 0          | 0          |
| Colon                             | 1 (0.9%)    | 0          | 0          | 1 (2.6%)   |
| Total                             | 113         | 67         | 7          | 39         |

(77%–95%) for tissue NGS, and 80% (67%–89%) for ctDNA (Table 2). Among patients with breast cancer the PPV was 94% (85%–98%) overall, 97% (85%–100%) for tissue NGS and 93% (81%–99%) for ctDNA. Among patients with gastroesophageal adenocarcinomas, the rates of HER2 IHC and/or FISH testing was low (40%), but 5 of the 6 patients with tissue NGS amplification had HER2 IHC and/or FISH positivity. Among the non-breast, non-GEA patients, the PPV of tissue *ERBB2* CNG was 74% (52%–90%) and of ctDNA was 47% (20%–70%).

Nineteen cases had discordant NGS and IHC/FISH results (Table 3). All had IHC testing which showed no HER2 expression in 11, and HER2 1+ in 8. All of the patients showing discordance with *ERBB2* amplification by tissue NGS but lack of HER2 overexpression by IHC ( $n = 8$ ) had testing done from the same biopsy. For the 11 cases with discordance by ctDNA analysis and IHC, the median time between the biopsy used for IHC testing and ctDNA analysis was 0 months, with a range of 0–25 months).

Discordant cases included 4 breast cancer cases, 3 of which lacked HER2 overexpression but had CNG of

varying degrees by ctDNA. The remaining discordant breast cancer case had tissue NGS amplification and HER2 copy number >4, but given the lack of overexpression and HER2/CEP17 ratio <2.0, was negative per guidelines for patients falling into Group 4 with the comment “it is uncertain whether patients [...] benefit from HER2 targeted therapy in the absence of protein overexpression”. One discordant case also harbored a missense single nucleotide polymorphism in *ERBB2* of unknown significance.

Eight cases had equivocal HER2 IHC/FISH results. This included 7 non-breast, non-GEA cases with an equivocal IHC score (2+) but no FISH testing. One case of breast cancer had a HER2 copies of 35 but HER2/CEP17 ratio of only 1.04, meeting Group 3 criteria. However, subsequent IHC testing was not completed, so the case remained equivocal. Of note, about half (53%) of all patients with NGS *ERBB2* amplification had IHC testing, of which 88% had at least some HER2 expression (IHC score 1+, 2+, or 3+). The PPV for any level of HER2 IHC expression was 95% for breast, 100% for GEA, and 73% for non-breast non-GEA.

**Table 2: Proportion of patients with *ERBB2* CNG with HER2 tissue IHC and/or FISH testing and PPV of *ERBB2* CNG for HER2-positivity**

|         | NGS (tissue and/or ctDNA) |                           | Tissue NGS          |                           | ctDNA               |                          |
|---------|---------------------------|---------------------------|---------------------|---------------------------|---------------------|--------------------------|
|         | % complete IHC/FISH       | PPV (%; 95% CI)           | % complete IHC/FISH | PPV (%; 95% CI)           | % complete IHC/FISH | PPV (%; 95% CI)          |
| Overall | 105/176 = 60%             | 86/105 = 82%<br>(73%–89%) | 65/112 = 58%        | 57/65 = 88%<br>(77%–95%)  | 59/91 = 65%         | 47/59 = 80%<br>(67%–89%) |
| Breast  | 66/67 = 99%               | 62/66 = 94%<br>(85%–98%)  | 36/37 = 97%         | 35/36 = 97%<br>(85%–100%) | 43/44 = 98%         | 40/43 = 93%<br>(81%–99%) |
| GEA     | 6/15 = 40%                | 5/6 = 83%<br>(36%–100%)   | 6/14 = 43%          | 5/6 = 83%<br>(36%–100%)   | 0/1 = 0             | 0<br>(0%–98%)            |
| Other   | 33/94 = 35%               | 19/33 = 58%<br>(39%–75%)  | 23/61 = 38%         | 17/23 = 74%<br>(52%–90%)  | 16/46 = 35%         | 7/16 = 44%<br>(20%–70%)  |

**Table 3: Cases with discordant results in HER2 by NGS and IHC/FISH**

| Disease subtype            | IHC score | FISH ratio | HER2 copy number | ASCO/CAP classification        | Tissue NGS <i>ERBB2</i> CNG, laboratory performing NGS | ctDNA <i>ERBB2</i> amp | Months between tissue for HER2 IHC/FISH & NGS |
|----------------------------|-----------|------------|------------------|--------------------------------|--------------------------------------------------------|------------------------|-----------------------------------------------|
| Breast                     | 0         | –          | –                | Negative                       | –                                                      | +                      | 1                                             |
| Breast                     | 0         | –          | –                | Negative                       | –                                                      | ++                     | 25                                            |
| Breast                     | 0         | –          | –                | Negative                       | –                                                      | +++                    | 0                                             |
| Breast                     | 1+        | 1.35       | 4.6              | Group 4, negative with comment | CNG, Tempus                                            | –                      | 0                                             |
| NSCLC, adenocarcinoma      | 0         | –          | –                | No standard                    | CNG, Foundation                                        | +                      | 0                                             |
| NSCLC, squamous            | 1+        | –          | –                | No standard                    | –                                                      | ++                     | 0                                             |
| NSCLC, neuroendocrine      | 0         | –          | –                | No standard                    | CNG, Foundation                                        | –                      | 0                                             |
| NSCLC, adenocarcinoma      | 1+        | –          | –                | No standard                    | –                                                      | +                      | 6                                             |
| NSCLC                      | 1+        | –          | –                | No standard                    | –                                                      | +                      | 0                                             |
| NSCLC, squamous            | 0         | –          | –                | No standard                    | –                                                      | ++                     | 12                                            |
| Colorectal                 | 0         | –          | –                | No standard                    | CNG, Tempus                                            | –                      | 0                                             |
| Colorectal                 | 0         | –          | –                | No standard                    | CNG, Foundation                                        | –                      | 0                                             |
| Pancreatic                 | 0         | –          | –                | No standard                    | –                                                      | ++                     | 10                                            |
| SCLC                       | 0         | –          | –                | No standard                    | –                                                      | ++                     | 0                                             |
| Esophageal, adenocarcinoma | 1+        | –          | –                | Negative                       | CNG, Foundation                                        | –                      | 0                                             |
| Esophageal, squamous       | 1+        | –          | –                | Negative                       | –                                                      | +                      | 0                                             |
| RCC                        | 1+        | –          | –                | No standard                    | CNG, Foundation                                        | –                      | 0                                             |
| Urothelial                 | 1+        | –          | –                | No standard                    | CNG, Foundation                                        | –                      | 0                                             |
| Ovarian                    | 0         | –          | –                | No standard                    | –                                                      | ++                     | 0                                             |

## DISCUSSION

The utilization of NGS testing in advanced malignancies continues to increase dramatically as options for targeted therapies have expanded and accessibility, affordability, and efficiency of NGS testing have improved [8, 9]. As a result, *ERBB2* CNG may be discovered by NGS testing but its correlation with standard HER2 testing by IHC for overexpression or FISH for amplification, which have been validated in breast and GEA cancers to predict benefit from HER2-therapy, is less well understood.

Our study demonstrated *ERBB2* CNG found on NGS testing across over 10 different tumor types. Over half of the cases of *ERBB2* CNG were found in tumors for which HER2 testing is not routine and there is no standard HER2 IHC/FISH cut offs. This is consistent with data shown in large metastatic cancer NGS databases [10–12]. This is noteworthy because of rapid growth in therapeutics targeting HER2 and studies suggesting the impact of HER2 therapies can be seen in multiple cancer subtypes with HER2 overexpression or amplifications [13–17].

Our retrospective study showed *ERBB2* CNG in breast cancer cases has a high PPV for HER2-positivity by IHC/FISH by ASCO/CAP 2018 guidelines (PPV for tissue NGS 97%, ctDNA 93%). This finding is consistent with reported data regarding the high concordance of *ERBB2* CNG by tissue NGS with the MSK-IMPACT assay and HER2 IHC/FISH testing [18]. Additionally, the rates of false positive *ERBB2* amplification by NGS for breast cancer (6%) is similar to inter-laboratory differences seen with IHC/FISH testing for breast cancer [19]. The high PPV of *ERBB2* CNG for HER2-positivity in breast cancer is particularly relevant as tissue biopsies can be a challenge for patients with bone predominant disease. Not only are these tissue biopsies often challenging to obtain, but the processing required for these biopsies (i.e. decalcification) interferes with both the IHC and FISH assays, and these assays are often not validated for use on decalcified specimens, with a higher risk for a false negative on decalcified specimens. Additionally, HER2 heterogeneity and tumor evolution may mean the HER2 IHC/FISH results from an initial biopsy or surgical resection specimen may not accurately reflect a patient's current HER2-status, especially given the relatively long disease course of many patients with advanced breast cancer. One recently published breast cancer cohort also suggested high concordance between tissue IHC/FISH and *ERBB2* CNG by ctDNA [20]. Together, these findings suggest that ctDNA *ERBB2* CNG is likely to be an accurate marker of HER2-positivity as determined by traditional assays. If ctDNA reveals *ERBB2* CNG discordant from a prior HER2-negative tissue IHC/FISH, it may prompt consideration of a new biopsy and/or use of HER2 therapy as the discordance may be a result of HER2 heterogeneity or tumor evolution rather than assay variability.

Our study was limited by a low proportion of patients with GEA having IHC/FISH testing. Nevertheless, in GEA with testing available, *ERBB2* CNG by tissue NGS had a relatively high PPV (83%) for HER2-positivity by ASCO/CAP guidelines. This is consistent with reported findings of a high concordance between tissue NGS *ERBB2* CNG and tissue IHC/FISH in GEA [18, 21–24]. Unfortunately, we did not identify patients with GEA ctDNA *ERBB2* CNG and IHC and/or FISH.

For non-breast, non-GEA cancers, only 35% had IHC and even fewer had FISH testing. In the group that had IHC and/or FISH, the discordance was higher, with a PPV of only 58% overall and 74% for tissue NGS and 44% for ctDNA. However, this discordance is primarily in *ERBB2* CNG by NGS and HER2 overexpression by IHC (IHC 3+) because only 7 of 33 non-breast non-GEA cases included in the PPV analysis had FISH testing. This discordance in *ERBB2* amplification by sequencing and HER2 protein expression has been shown in several tumors types [13, 14]. In colon cancer, NGS testing has been shown to have good concordance with tissue IHC/FISH testing although criteria for HER2-positivity in colon cancer have yet to be standardized [25, 26]. If similar findings are confirmed across tumor type, discovering tissue *ERBB2* CNG by NGS can facilitate clinical trial enrollment and utilization of HER2-therapy in diseases for which HER2 testing by IHC/FISH is not standard. Of note, in a study of 57 patients with metastatic colorectal cancer and *ERBB2* amplification, despite an overall objective response rate of 32%, none of the 8 patients with amplification without HER2 overexpression responded to trastuzumab and pertuzumab.

One potential reason for the lower PPV observed in non-breast cases include a chance finding due to small numbers. Another possible explanation is there is a lower prevalence of biologically important amplifications in HER2 in other malignancies, thus a lower pre-test probability and a higher risk of a false positive result.

The limited number of patients with non-breast malignancies who had ctDNA *ERBB2* CNG and tissue IHC/FISH prevents adequate evaluation of its PPV in these cohorts. Nevertheless, if the findings seen in breast cancer patients are replicated in other malignancies it could provide significant clinical value. Challenges of HER2 testing include disease heterogeneity and adequate tissue sampling, both areas where ctDNA may offer advantages in a wide variety of tumor types [27]. Thus, future studies of *ERBB2* CNG by ctDNA and HER2 IHC/FISH tissue correlation in both breast and non-breast cancer are needed. Such a study may also investigate whether co-alterations or other molecular signatures present along with *ERBB2* CNG that could predict the likelihood that the *ERBB2* CNG is reflective of a true biologically-relevant amplification likely to benefit from HER2 therapy.

One limitation of the study is our inability to determine the prevalence of *ERBB2* alterations by tumor type as some tumors where NGS testing has been

commonplace for longer, such as NSCLC, are likely to be over-represented in our database [8]. Another important limitation of our study is the limited number of non-breast patients who had IHC/FISH testing, making it challenging to determine an accurate PPV in these settings. Additionally, as we queried only those with *ERBB2* CNG, we are able to determine the PPV but not the sensitivity or negative predictive value. Disadvantages of the use of NGS testing for *ERBB2* evaluation are the presence of false positives, its reliance on the availability of tissue (more tissue sections required than IHC) or shedding of ctDNA, added cost, lack of insurance coverage, and added turnaround time.

A primary challenge in optimizing HER2 targeted therapy is accurately identifying patients who will benefit from treatment. HER2-positivity by IHC/ISH ASCO/CAP guidelines is based on their predictive value for trastuzumab efficacy in breast and GEA cancers, but likely does not capture the breadth of metastatic cancer patients who may benefit from the remarkable efficacy our expanding arsenal of HER2 agents that possess different activity profiles to trastuzumab. Additionally, IHC/FISH testing of a single, often archival biopsy specimen may not adequately capture tumor heterogeneity or evolution of HER2 status and may not provide the optimal threshold for HER2-positivity in the setting of newer therapy. As we study HER2 activity in novel settings with novel drugs (including trastuzumab-deruxtecan and other antibody-drug conjugates with activity in HER2-low settings), keeping a broad view of methods of evaluating HER2 (tissue IHC, tissue FISH, tissue NGS, ctDNA, expression on circulating tumor cells), their correlation, and their ability to predict benefit is important [28, 29]. In the setting of anti-HER2 therapy with activity in HER2-low disease, the PPV of NGS *ERBB2* amplification for any level of HER2 IHC expression reached 88%.

As we move into our third decade of developing HER2 therapy at a time where tumor agnostic treatment approaches and NGS testing in metastatic cancer is common, utilizing *ERBB2* CNG by NGS to identify patients for clinical trials evaluating novel HER2 therapies in new disease settings may be a more efficient screening strategy, and has been employed in the MyPathway (NCT 02091141) and NCI-MATCH (NCT 02465060) trials successfully. This is especially relevant in tumors types that have a lower prevalence of *ERBB2* amplification. Future efforts should look to validate the high PPV of *ERBB2* CNG by NGS for HER2-positive IHC/FISH in breast cancer and other tumor types and subsequently whether *ERBB2* CNG is predictive of benefit from HER2-targeted therapy.

## MATERIALS AND METHODS

The study was approved by the institutional review board and the requirement for informed consent was waived for this retrospective analysis. We queried our OncoSET database to identify patients within a single hospital

system (Northwestern Medicine) who had NGS performed by 3 commercial laboratory assays (FoundationOne and TempusX for tissue NGS, or Guardant360 for ctDNA) that revealed a CNG or amplification in *ERBB2* on the issued report between 2015 and 2019.

Clinical and pathologic information was subsequently gathered by review of the electronic medical record. The data obtained included patient demographic information and disease information including type of malignancy, histology, stage, detailed HER2 IHC and FISH testing when available, and other genomic alterations detected. Time course of disease was collected including date of diagnosis of advanced malignancy and date of sample collection for NGS. When possible, tissue was retrieved for HER2 IHC testing among patients with *ERBB2* NGS amplification but without IHC/FISH results. If IHC/FISH data were available for patients with breast cancer or gastroesophageal adenocarcinoma (GEA), the patient was classified as HER2-positive by ASCO/CAP guidelines [7, 30]. For all non-breast, non-GEA patients HER2-positivity was defined as IHC 3+, FISH ratio of >2.0, and/or HER2 copy number >6, similar to breast cancer and GEA criteria. Cases in which IHC score was 2+ and FISH was not available or FISH was equivocal and IHC was not available were considered equivocal.

Descriptive statistics were calculated for patient and disease characteristics of those identified as harboring an *ERBB2* CNG. The positive predictive value (PPV) of *ERBB2* CNG by NGS in predicting HER2-positivity by IHC/FISH was calculated by the overall population, type of sample (tissue NGS vs. ctDNA NGS), and by disease type (breast, GEA, other). If IHC/FISH results were equivocal because of incomplete testing, the cases were excluded from calculations of PPV. Binomial proportion was used to determine the 95% confidence interval.

## Abbreviations

CI: confidence interval; CNG: copy number gain; ctDNA: circulating tumor DNA; FISH: fluorescent *in situ* hybridization; GEA: Gastroesophageal adenocarcinoma; IHC: Immunohistochemistry; NGS: Next-generation sequencing; PPV: positive predictive value.

## Author contributions

All authors made contributions to the conception of the study, drafting and/or revising of important content, final approval of the version to be published, and are accountable for the accuracy and integrity of the submitted work.

## CONFLICTS OF INTEREST

ANS reports honorarium from AstraZeneca. AB reports speaker fees from Lilly, Roche, Thermo fisher scientific, and Foundation Medicine.

## FUNDING

Robert H. Lurie Comprehensive Cancer Center supports the OncoSET program.

## REFERENCES

1. Slamon DJ, Leyland-Jones B, Shak S, Fuchs H, Paton V, Bajamonde A, Fleming T, Eiermann W, Wolter J, Pegram M, Baselga J, Norton L. Use of chemotherapy plus a monoclonal antibody against HER2 for metastatic breast cancer that overexpresses HER2. *N Engl J Med.* 2001; 344:783–92. <https://doi.org/10.1056/NEJM200103153441101>. [PubMed]
2. Wetterstrand KA. DNA Sequencing Costs: Data from the NHGRI Genome Sequencing Program (GSP). Available at: <https://www.genome.gov/about-genomics/fact-sheets/DNA-Sequencing-Costs-Data>. Accessed [9/29/20].
3. Swain SM, Miles D, Kim SB, Im YH, Im SA, Semiglazov V, Ciruelos E, Schneeweiss A, Monturus E, Clark E, Knott A, Restuccia E, Benyunes M, Cortes J. End-of-study analysis from the phase III, randomized, double-blind, placebo (Pla)-controlled CLEOPATRA study of first-line (1L) pertuzumab (P), trastuzumab (H), and docetaxel (D) in patients (pts) with HER2-positive metastatic breast cancer (MBC). *J Clin Oncol.* 2019; 37:1020. [https://doi.org/10.1200/JCO.2019.37.15\\_suppl.1020](https://doi.org/10.1200/JCO.2019.37.15_suppl.1020).
4. Siena S, Sartore-Bianchi A, Trusolino L, Martino C, Bencardino K, Lonardi S, Zagonel V, Leone F, Martinelli E, Ciardiello F, Racca P, Amatu A, Palmeri L, et al. Abstract CT005: Final results of the HERACLES trial in HER2-amplified colorectal cancer. *Cancer Res.* 2017; 77:CT005. <https://doi.org/10.1158/1538-7445.AM2017-CT005>.
5. Yoshizawa A, Sumiyoshi S, Sonobe M, Kobayashi M, Uehara T, Fujimoto M, Tsuruyama T, Date H, Haga H. HER2 status in lung adenocarcinoma: a comparison of immunohistochemistry, fluorescence *in situ* hybridization (FISH), dual-ISH, and gene mutations. *Lung Cancer.* 2014; 85:373–78. <https://doi.org/10.1016/j.lungcan.2014.06.007>. [PubMed]
6. Bang YJ, Van Cutsem E, Feyereislova A, Chung HC, Shen L, Sawaki A, Lordick F, Ohtsu A, Omuro Y, Satoh T, Aprile G, Kulikov E, Hill J, et al, and ToGA Trial Investigators. Trastuzumab in combination with chemotherapy versus chemotherapy alone for treatment of HER2-positive advanced gastric or gastro-oesophageal junction cancer (ToGA): a phase 3, open-label, randomised controlled trial. *Lancet.* 2010; 376:687–97. [https://doi.org/10.1016/S0140-6736\(10\)61121-X](https://doi.org/10.1016/S0140-6736(10)61121-X). [PubMed]
7. Wolff AC, Hammond MEH, Allison KH, Harvey BE, Mangu PB, Bartlett JMS, Bilous M, Ellis IO, Fitzgibbons P, Hanna W, Jenkins RB, Press MF, Spears PA, et al. Human Epidermal Growth Factor Receptor 2 Testing in Breast Cancer: American Society of Clinical Oncology/College of American Pathologists Clinical Practice Guideline Focused Update. *J Clin Oncol.* 2018; 36:2105–22. <https://doi.org/10.1200/JCO.2018.77.8738>. [PubMed]
8. Sheinson DM, Wong WB, Flores C, Ogale S, Gross CP. Association Between Medicare's National Coverage Determination and Utilization of Next-Generation Sequencing. *JCO Oncol Pract.* 2021; 17:e1774–84. <https://doi.org/10.1200/OP.20.01023>. [PubMed]
9. Desai K, Hooker G, Gilbert K, Cropper C, Metcalf R, Kachroo S. Real-world trends in costs of next generation sequencing (NGS) testing in U.S. setting. *J Clin Oncol.* 2021; 39:e18824. [https://doi.org/10.1200/JCO.2021.39.15\\_suppl.e18824](https://doi.org/10.1200/JCO.2021.39.15_suppl.e18824).
10. Cerami E, Gao J, Dogrusoz U, Gross BE, Sumer SO, Aksoy BA, Jacobsen A, Byrne CJ, Heuer ML, Larsson E, Antipin Y, Reva B, Goldberg AP, et al. The cBio cancer genomics portal: an open platform for exploring multidimensional cancer genomics data. *Cancer Discov.* 2012; 2:401–04. <https://doi.org/10.1158/2159-8290.CD-12-0095>. [PubMed]
11. Zehir A, Benayed R, Shah RH, Syed A, Middha S, Kim HR, Srinivasan P, Gao J, Chakravarty D, Devlin SM, Hellmann MD, Barron DA, Schram AM, et al. Mutational landscape of metastatic cancer revealed from prospective clinical sequencing of 10,000 patients. *Nat Med.* 2017; 23:703–13. <https://doi.org/10.1038/nm.4333>. [PubMed]
12. Robinson DR, Wu YM, Lonigro RJ, Vats P, Cobain E, Everett J, Cao X, Rabban E, Kumar-Sinha C, Raymond V, Schuetz S, Alva A, Siddiqui J, et al. Integrative clinical genomics of metastatic cancer. *Nature.* 2017; 548:297–303. <https://doi.org/10.1038/nature23306>. [PubMed]
13. Meric-Bernstam F, Hurwitz H, Raghav KPS, McWilliams RR, Fakih M, VanderWalde A, Swanton C, Kurzrock R, Burris H, Sweeney C, Bose R, Spigel DR, Beattie MS, et al. Pertuzumab plus trastuzumab for HER2-amplified metastatic colorectal cancer (MyPathway): an updated report from a multicentre, open-label, phase 2a, multiple basket study. *Lancet Oncol.* 2019; 20:518–30. [https://doi.org/10.1016/S1470-2045\(18\)30904-5](https://doi.org/10.1016/S1470-2045(18)30904-5). [PubMed]
14. Javle M, Borad MJ, Azad NS, Kurzrock R, Abou-Alfa GK, George B, Hainsworth J, Meric-Bernstam F, Swanton C, Sweeney CJ, Friedman CF, Bose R, Spigel DR, et al. Pertuzumab and trastuzumab for HER2-positive, metastatic biliary tract cancer (MyPathway): a multicentre, open-label, phase 2a, multiple basket study. *Lancet Oncol.* 2021; 22:1290–300. [https://doi.org/10.1016/S1470-2045\(21\)00336-3](https://doi.org/10.1016/S1470-2045(21)00336-3). [PubMed]
15. Bryce AH, Kurzrock R, Meric-Bernstam F, Hurwitz H, Hainsworth JD, Spigel DR, Bose R, Swanton C, Burris HA, Guo S, Yoo B, Beattie MS, Tayama D, Sweeney C. Pertuzumab plus trastuzumab for HER2-positive metastatic urothelial cancer (mUC): Preliminary data from MyPathway. *J Clin Oncol.* 2017; 35:348. [https://doi.org/10.1200/JCO.2017.35.6\\_suppl.348](https://doi.org/10.1200/JCO.2017.35.6_suppl.348).
16. Peters S, Stahel R, Bubendorf L, Bonomi P, Villegas A, Kowalski DM, Baik CS, Isla D, Carpeno JC, Garrido P, Rittmeyer A, Tiseo M, Meyenberg C, et al. Trastuzumab

- Emtansine (T-DM1) in Patients with Previously Treated HER2-Overexpressing Metastatic Non-Small Cell Lung Cancer: Efficacy, Safety, and Biomarkers. *Clin Cancer Res.* 2019; 25:64–72. <https://doi.org/10.1158/1078-0432.CCR-18-1590>. [PubMed]
17. Jhaveri KL, Wang XV, Makker V, Luoh SW, Mitchell EP, Zwiebel JA, Sharon E, Gray RJ, Li S, McShane LM, Rubinstein LV, Patton D, Williams PM, et al. Ado-trastuzumab emtansine (T-DM1) in patients with HER2-amplified tumors excluding breast and gastric/gastroesophageal junction (GEJ) adenocarcinomas: results from the NCI-MATCH trial (EAY131) subprotocol Q. *Ann Oncol.* 2019; 30:1821–30. <https://doi.org/10.1093/annonc/mdz291>. [PubMed]
  18. Ross DS, Zehir A, Cheng DT, Benayed R, Nafa K, Hechtman JF, Janjigian YY, Weigelt B, Razavi P, Hyman DM, Baselga J, Berger MF, Ladanyi M, Arcila ME. Next-Generation Assessment of Human Epidermal Growth Factor Receptor 2 (ERBB2) Amplification Status: Clinical Validation in the Context of a Hybrid Capture-Based, Comprehensive Solid Tumor Genomic Profiling Assay. *J Mol Diagn.* 2017; 19:244–54. <https://doi.org/10.1016/j.jmoldx.2016.09.010>. [PubMed]
  19. Dowsett M, Hanna WM, Kockx M, Penault-Llorca F, Rüschoff J, Gutjahr T, Habben K, van de Vijver MJ. Standardization of HER2 testing: results of an international proficiency-testing ring study. *Mod Pathol.* 2007; 20:584–91. <https://doi.org/10.1038/modpathol.3800774>. [PubMed]
  20. Guan X, Liu B, Niu Y, Dong X, Zhu X, Li C, Li L, Yi Z, Sun X, Chen H, Lu S, Ma F. Longitudinal HER2 amplification tracked in circulating tumor DNA for therapeutic effect monitoring and prognostic evaluation in patients with breast cancer. *Breast.* 2020; 49:261–66. <https://doi.org/10.1016/j.breast.2019.12.010>. [PubMed]
  21. Gao J, Wang H, Zang W, Li B, Rao G, Li L, Yu Y, Li Z, Dong B, Lu Z, Jiang Z, Shen L. Circulating tumor DNA functions as an alternative for tissue to overcome tumor heterogeneity in advanced gastric cancer. *Cancer Sci.* 2017; 108:1881–87. <https://doi.org/10.1111/cas.13314>. [PubMed]
  22. Wang H, Li B, Liu Z, Gong J, Shao L, Ren J, Niu Y, Bo S, Li Z, Lai Y, Lu S, Gao J, Shen L. HER2 copy number of circulating tumour DNA functions as a biomarker to predict and monitor trastuzumab efficacy in advanced gastric cancer. *Eur J Cancer.* 2018; 88:92–100. <https://doi.org/10.1016/j.ejca.2017.10.032>. [PubMed]
  23. Niu D, Li L, Yu Y, Zang W, Li Z, Zhou L, Jia L, Rao G, Gao L, Cheng G, Ji K, Lin D. Evaluation of Next Generation Sequencing for Detecting HER2 Copy Number in Breast and Gastric Cancers. *Pathol Oncol Res.* 2020; 26:2577–85. <https://doi.org/10.1007/s12253-020-00844-w>. [PubMed]
  24. Lin D, Ji J, Niu D, Li L, Yu Y, Gao Y, Zhang W, Li Z, Rao G, Gao L, Cheng G. Evaluation of next generation sequencing for detecting HER2 copy number in breast and gastric cancers. *J Clin Oncol.* 2019; 37:e13004. [https://doi.org/10.1200/JCO.2019.37.15\\_suppl.e13004](https://doi.org/10.1200/JCO.2019.37.15_suppl.e13004).
  25. Fujii S, Magliocco AM, Kim J, Okamoto W, Kim JE, Sawada K, Nakamura Y, Kopetz S, Park WY, Tsuchihara K, Kim TW, Raghav K, Yoshino T. International Harmonization of Provisional Diagnostic Criteria for ERBB2-Amplified Metastatic Colorectal Cancer Allowing for Screening by Next-Generation Sequencing Panel. *JCO Precis Oncol.* 2020; 4:6–19. <https://doi.org/10.1200/PO.19.00154>.
  26. Cenaj O, Ligon AH, Hornick JL, Sholl LM. Detection of ERBB2 Amplification by Next-Generation Sequencing Predicts HER2 Expression in Colorectal Carcinoma. *Am J Clin Pathol.* 2019; 152:97–108. <https://doi.org/10.1093/ajcp/aqz031>. [PubMed]
  27. Pectasides E, Stachler MD, Derks S, Liu Y, Maron S, Islam M, Alpert L, Kwak H, Kindler H, Polite B, Sharma MR, Allen K, O'Day E, et al. Genomic Heterogeneity as a Barrier to Precision Medicine in Gastroesophageal Adenocarcinoma. *Cancer Discov.* 2018; 8:37–48. <https://doi.org/10.1158/2159-8290.CD-17-0395>. [PubMed]
  28. Modi S, Tsurutani J, Tamura K, Park H, Sagara Y, Murthy R, Iwata H, Krop IE, Doi T, Redfern C, Moreno-Aspitia A, Redman R, Lee C, et al. Abstract P6-17-02: Trastuzumab deruxtecan (DS-8201a) in subjects with HER2-low expressing breast cancer: Updated results of a large phase 1 study. *Cancer Res.* 2019; 79:P6-17-02. <https://doi.org/10.1158/1538-7445.SABCS18-P6-17-02>.
  29. Yamaguchi K, Bang YJ, Iwasa S, Sugimoto N, Ryu MH, Sakai D, Chung HCC, Kawakami H, Yabusaki H, Lee J, Saito K, Kawaguchi Y, Kamio T, et al. Trastuzumab deruxtecan (T-DXd; DS-8201) in patients with HER2-positive advanced gastric or gastroesophageal junction (GEJ) adenocarcinoma: Final overall survival (OS) results from a randomized, multicenter, open-label, phase 2 study (DESTINY-Gastric01). *J Clin Oncol.* 2021; 39:4048. [https://doi.org/10.1200/JCO.2021.39.15\\_suppl.4048](https://doi.org/10.1200/JCO.2021.39.15_suppl.4048).
  30. Bartley AN, Washington MK, Colasacco C, Ventura CB, Ismaila N, Benson AB 3rd, Carrato A, Gulley ML, Jain D, Kakar S, Mackay HJ, Streutker C, Tang L, et al. HER2 Testing and Clinical Decision Making in Gastroesophageal Adenocarcinoma: Guideline From the College of American Pathologists, American Society for Clinical Pathology, and the American Society of Clinical Oncology. *J Clin Oncol.* 2017; 35:446–64. <https://doi.org/10.1200/JCO.2016.69.4836>. [PubMed]
